# Supplementary material for: Enantiodivergent Synthesis of Benzoquinolizidinones from L-Glutamic Acid
Source: MDPI journal article supplement (doi:10.3390/molecules26195866), 2021-09-28

Supplementary Information

# Enantiodivergent Synthesis of Benzoquinolizidinones from L-glutamic Acid

Punlop Kuntiyong \*, Duangkamon Namborisut, Kunita Phakdeeyothin, Rungrawin Chatpreecha and Kittisak Thammapichai

Department of Chemistry, Faculty of Science, Silpakorn University, Muang Nakhon Pathom 73000, Thailand; duangkamon177@gmail.com (D.N.); kunita.phakdeeyothin@gmail.com (K.P.); chatpreecha\_R@su.ac.th (R.C.); kittisakthammapichai@gmail.com (K.T.)

\* Correspondence: kuntiyong\_p@su.ac.th; Tel.: +66-8-2569-9902

<sup>1</sup>H and <sup>13</sup>C NMR Spectra of Compounds synthesized in this study (**11**, **12**, **14**, **15**, **17**, *ent*-**15**, **18**, **19**, **21**, **22**, **24**, *ent*-**22**, **26** and **28**)

(3*S*,5*R*)-1-(3,4-Dimethoxyphenylethyl)-3-(dibenzylamino)-5-((*R*)-1-hydroxyethyl)piperidine-2,6-dione TBS ether **11**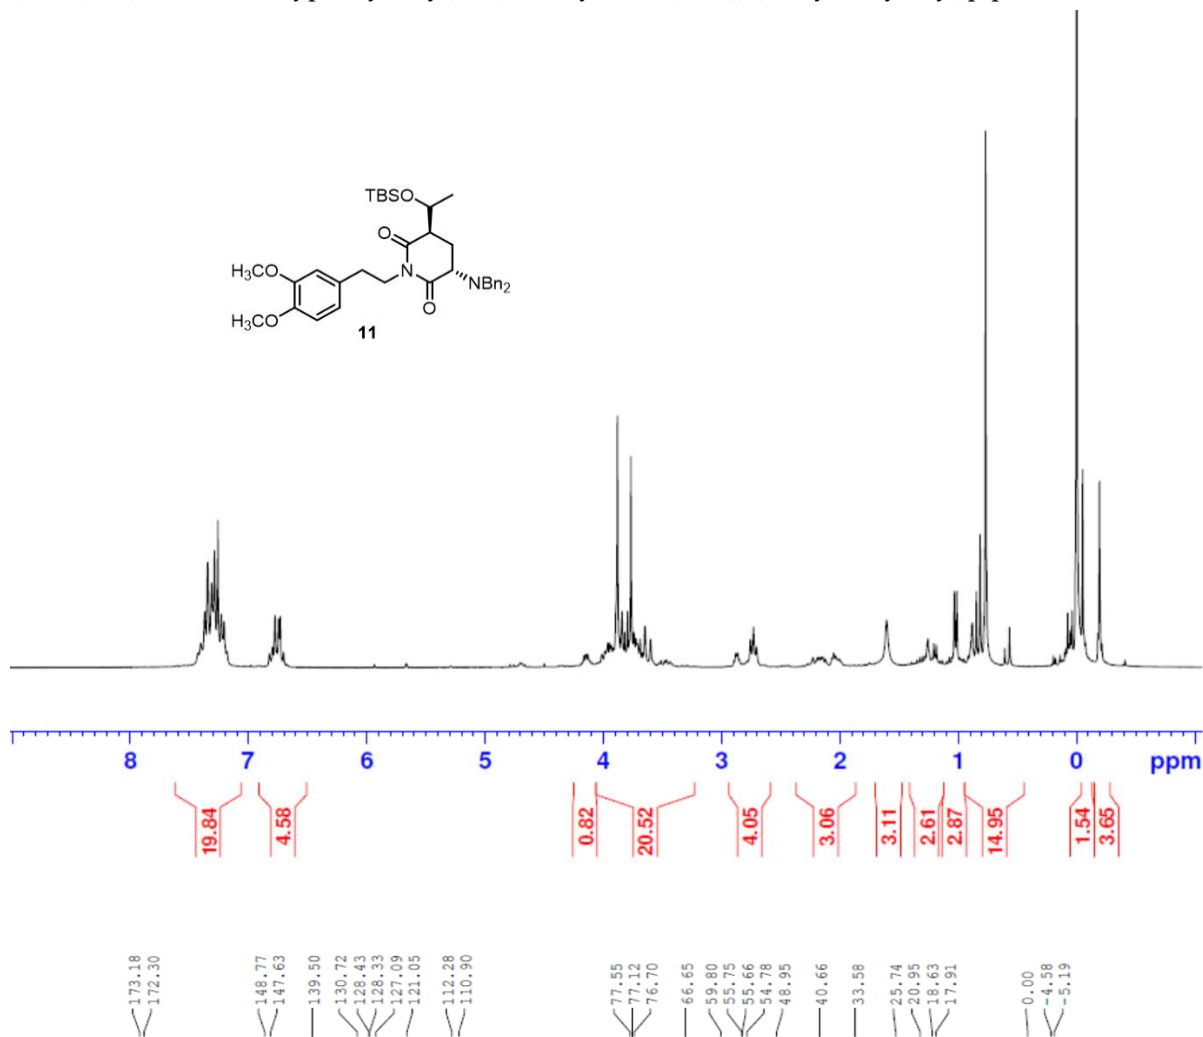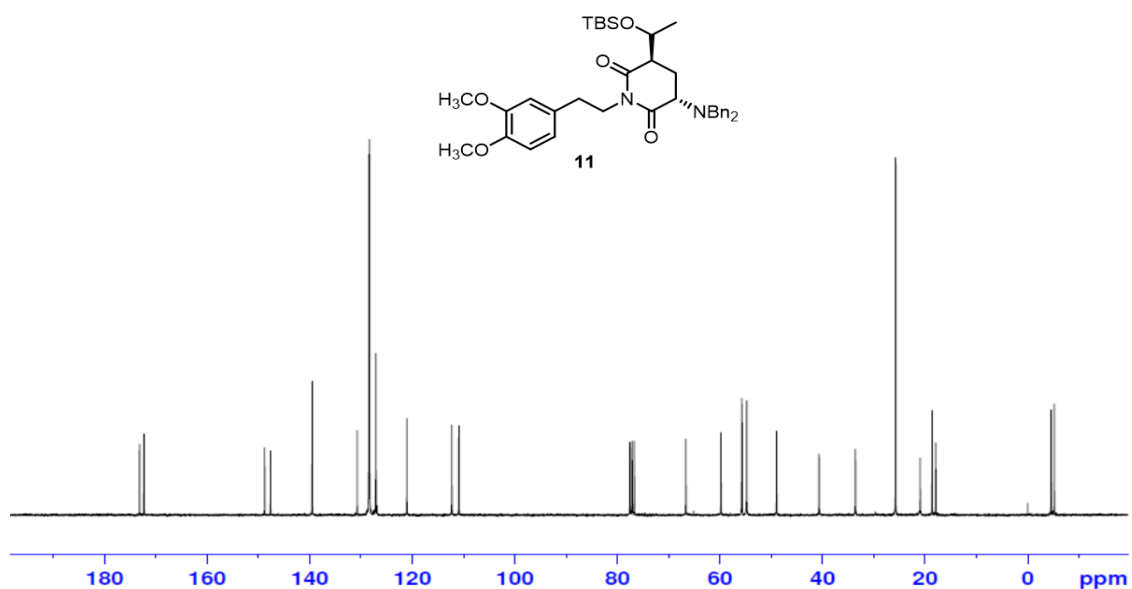

(3*S*,5*S*)-1-(3,4-Dimethoxyphenylethyl)-3-(dibenzylamino)-5-((*S*)-1-hydroxyethyl)piperidine-2,6-dione TBS ether **12**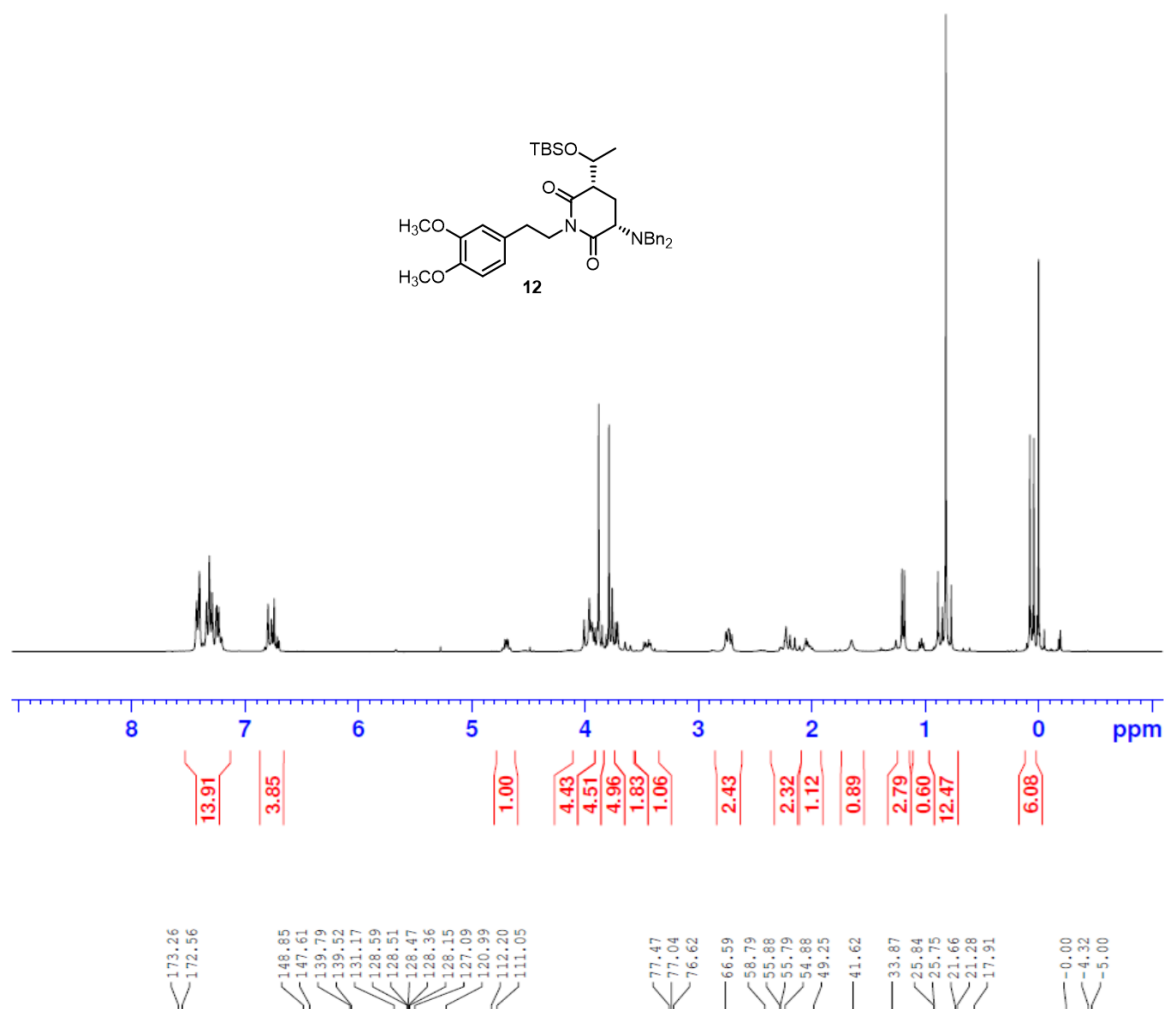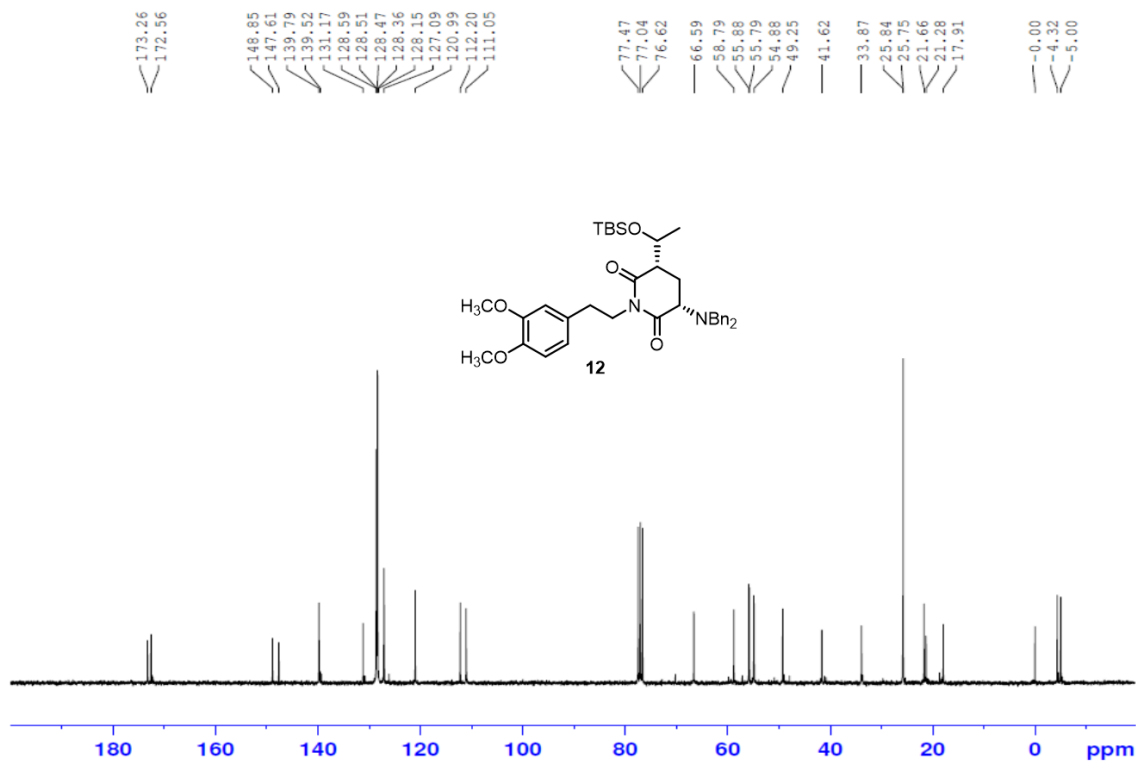

(1*S*,3*R*,11*bR*)-1-(dibenzylamino)-2,3,6,7-tetrahydro-3-((*S*)-1-hydroxyethyl)-9,10-dimethoxy-1*H*-pyrido[2,1-*a*]isoquinolin-4(11*bH*)-one (**14**)

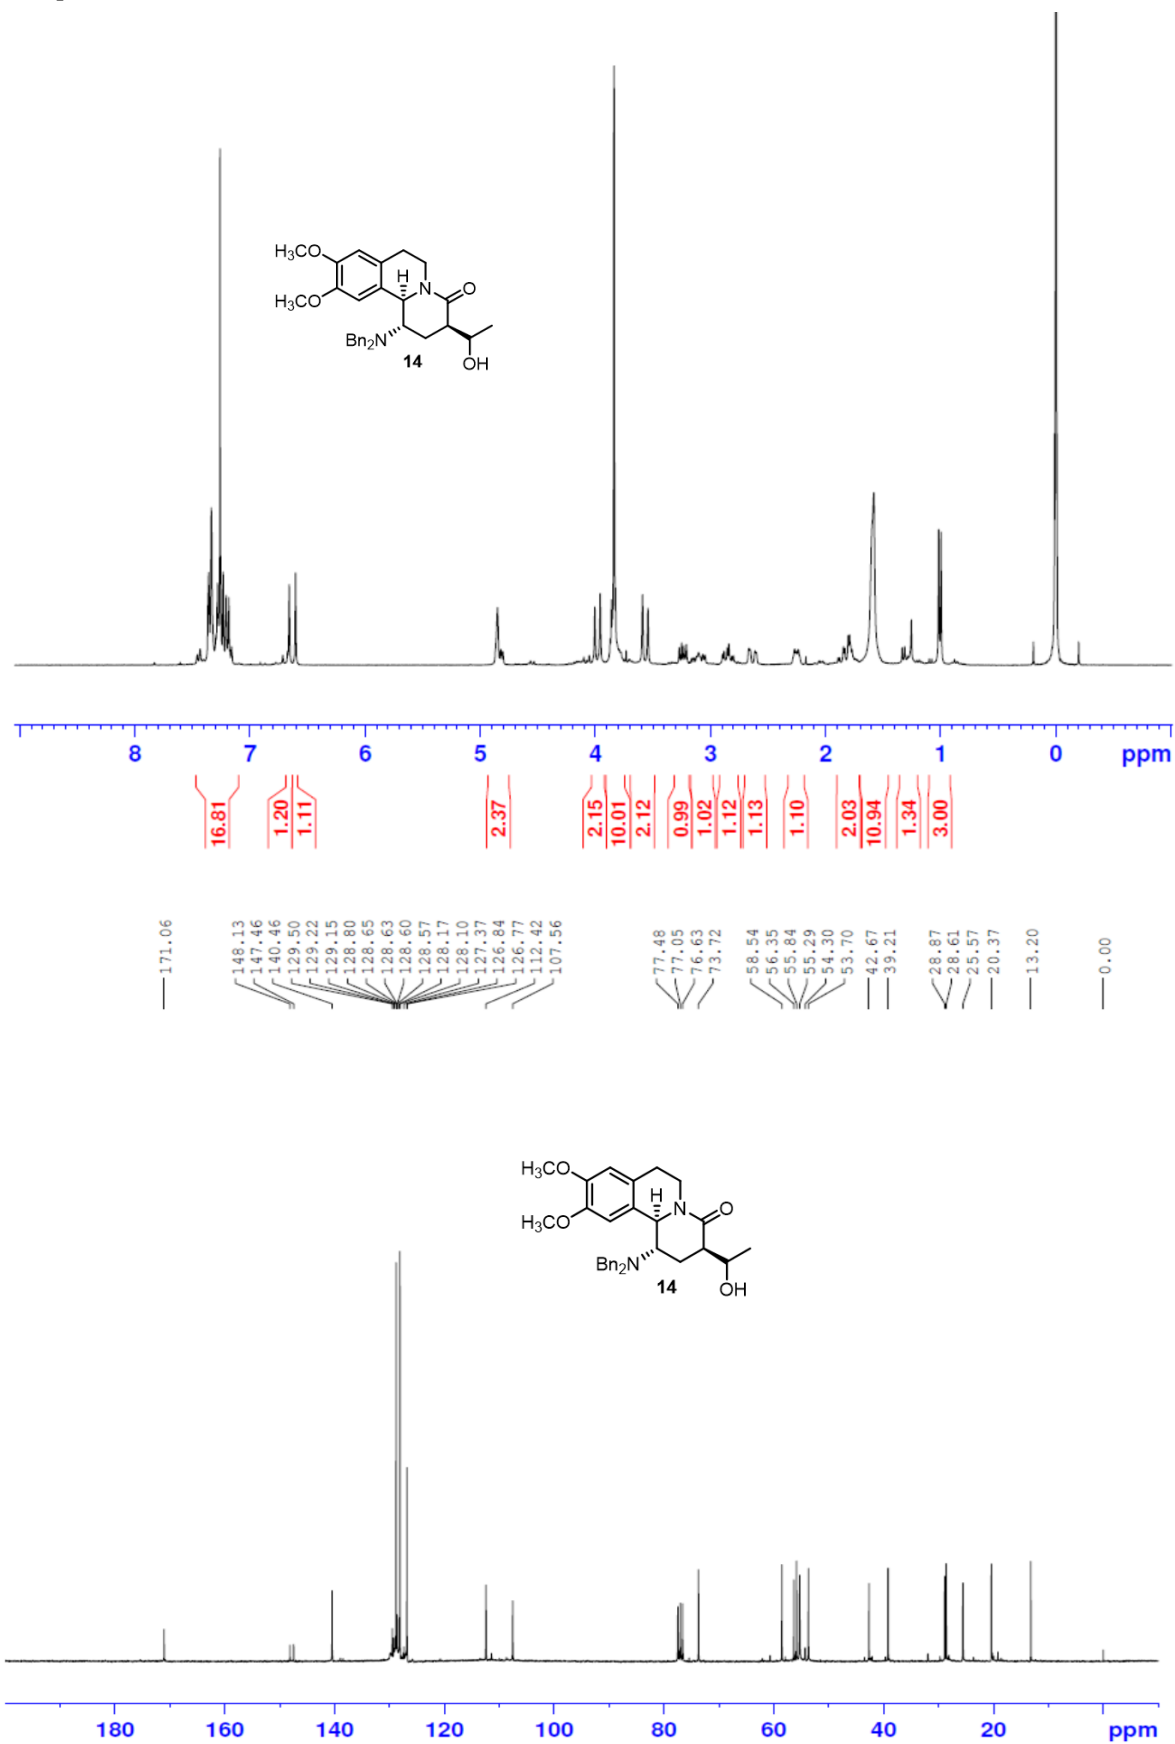

(3*R*,11*bS*)-6,7-dihydro-3-((*S*)-1-hydroxyethyl)-9,10-dimethoxy-3*H*-pyrido[2,1-*a*]isoquinolin-4(11*bH*)-one (**15**)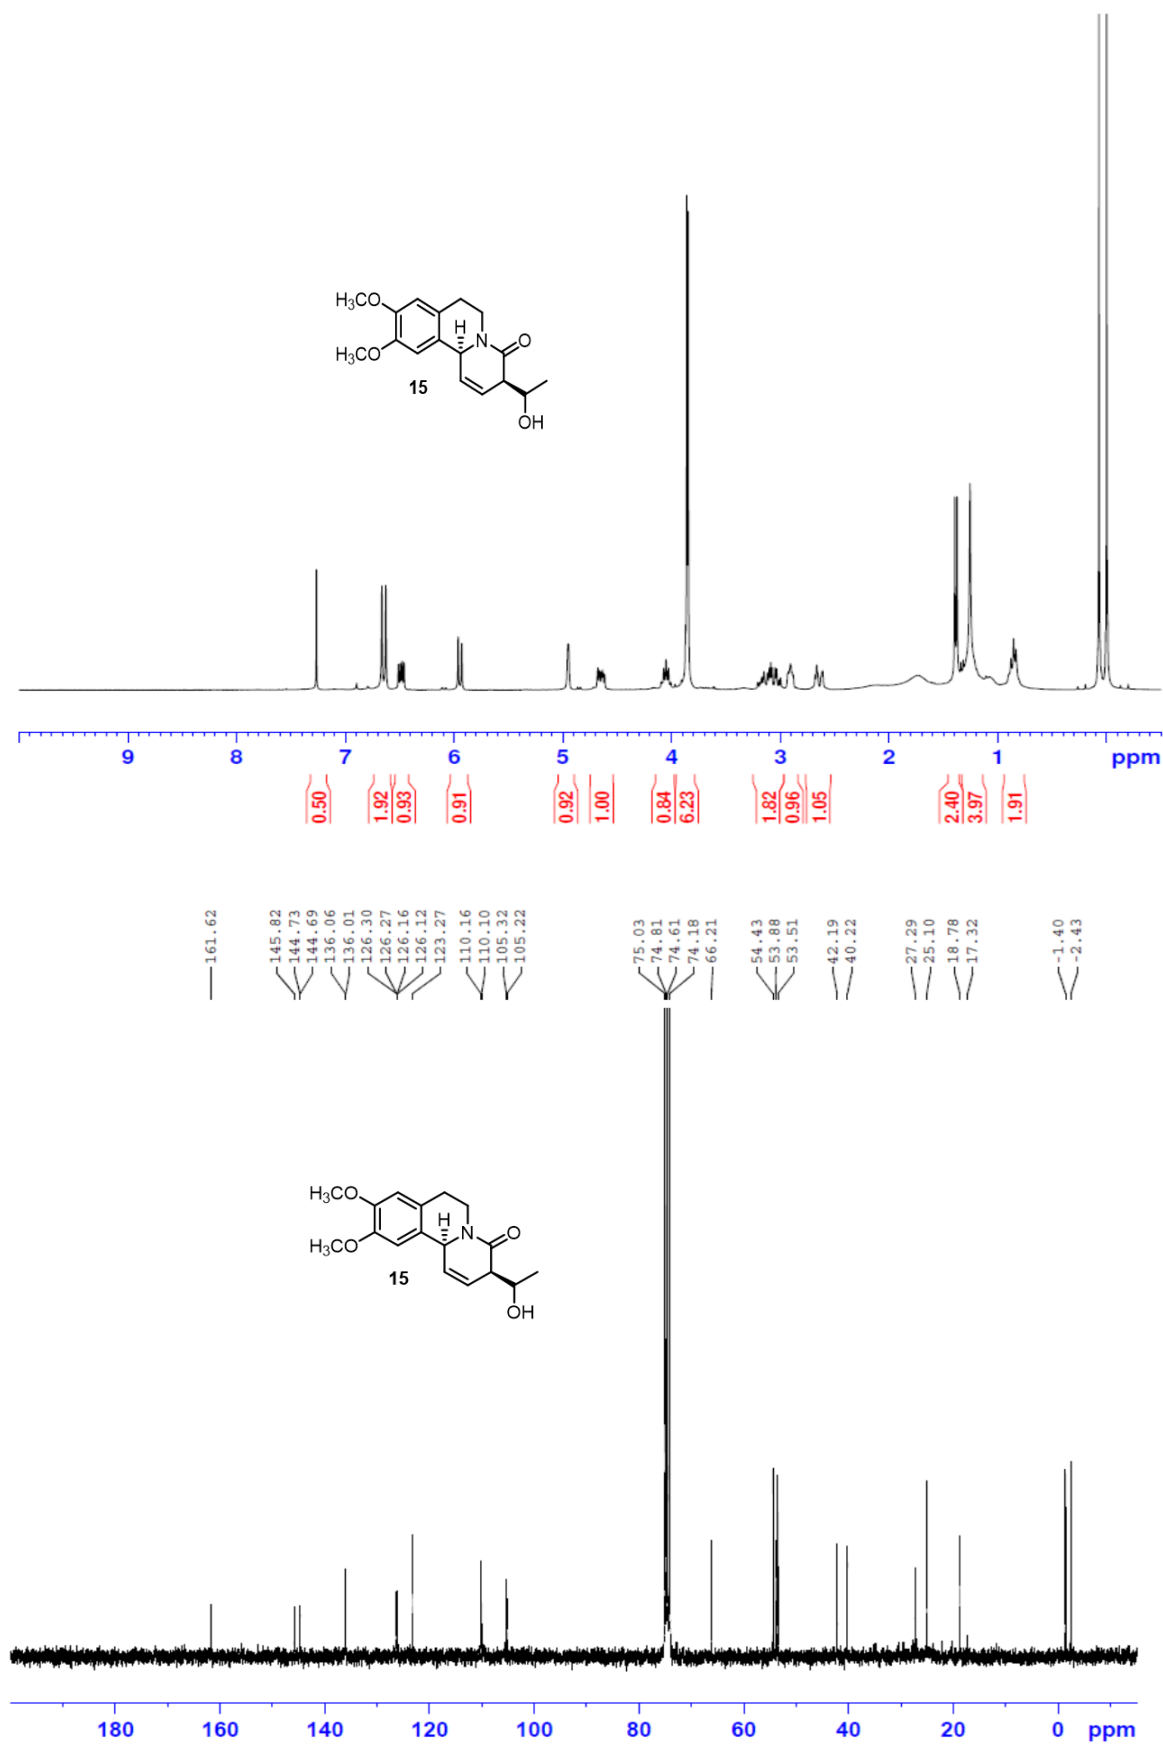

(1*S*,3*S*,11*bS*)-1-(dibenzylamino)-2,3,6,7-tetrahydro-3-((*S*)-1-hydroxyethyl)-9,10-dimethoxy-1*H*-pyrido[2,1-*a*]isoquinolin-4(11*bH*)-one (17)

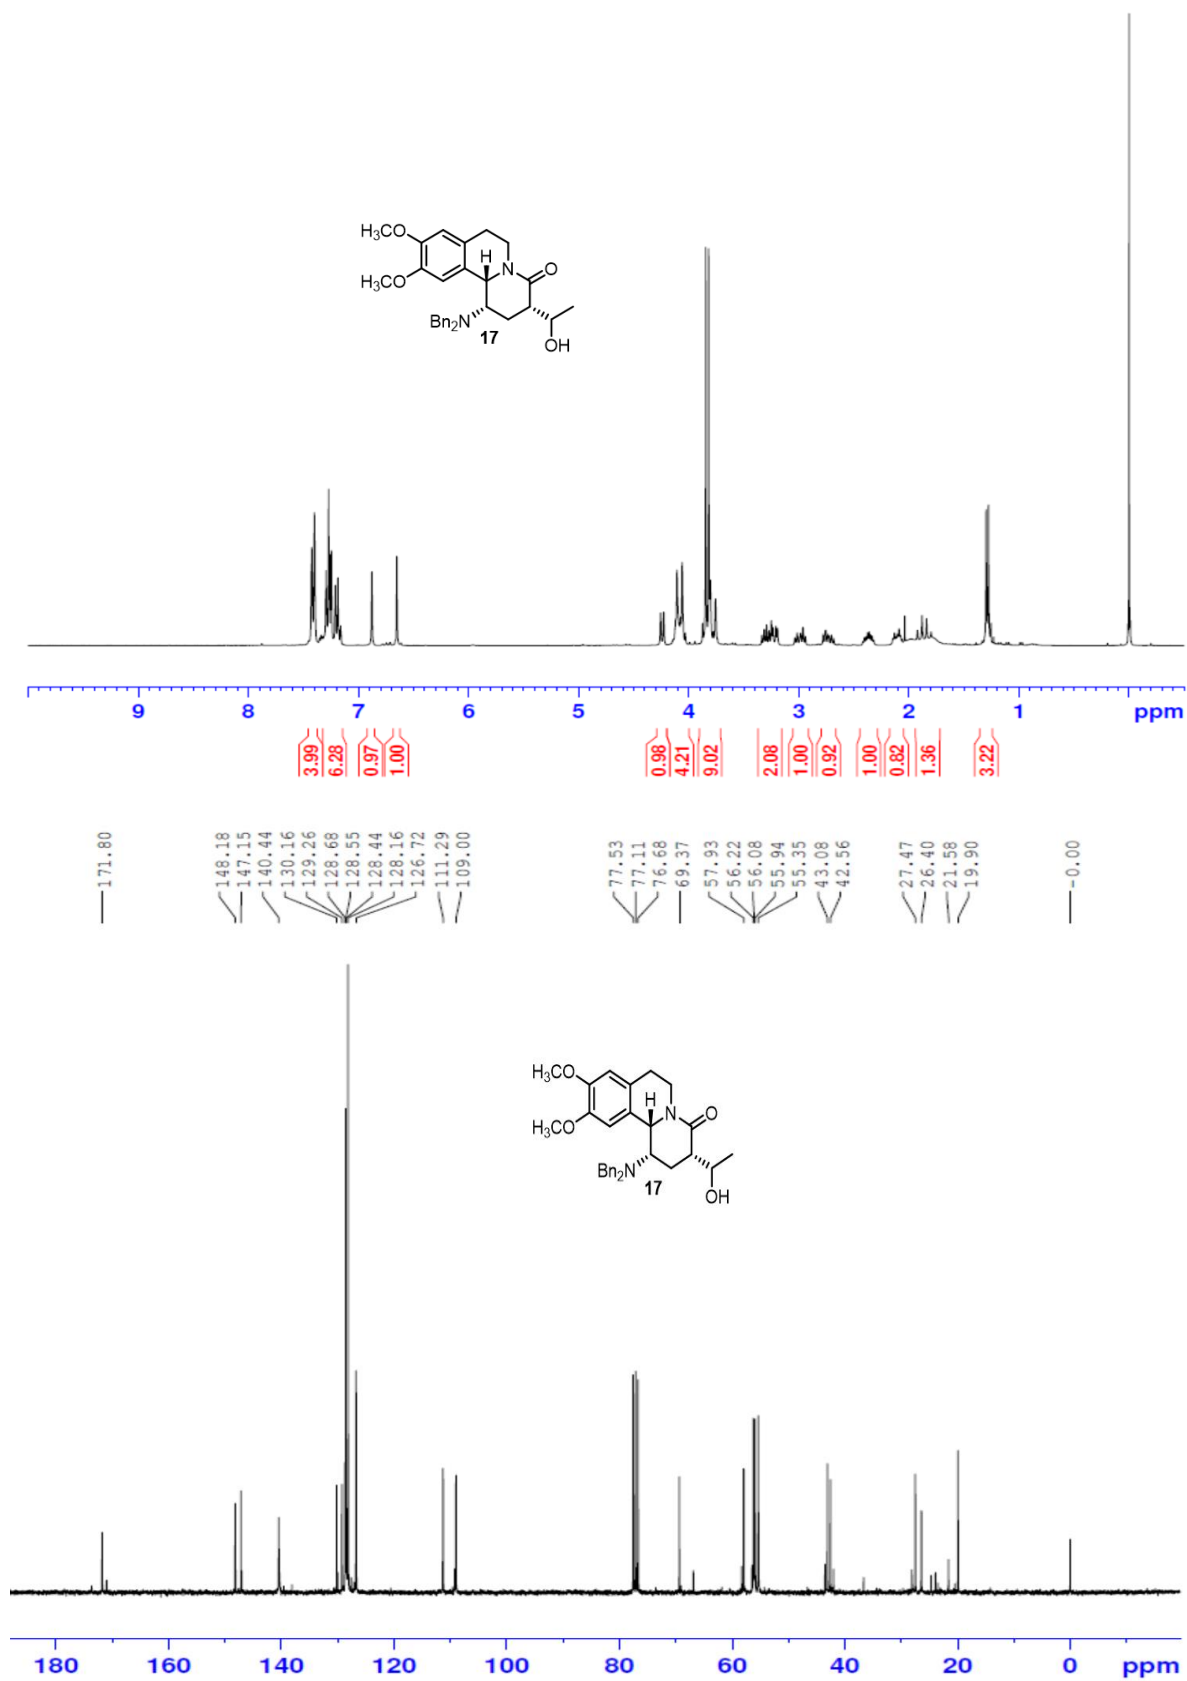

(3*S*,11*bR*)-6,7-dihydro-3-((*R*)-1-hydroxyethyl)-9,10-dimethoxy-3*H*-pyrido[2,1-*a*]isoquinolin-4(11*bH*)-one (*ent*-15)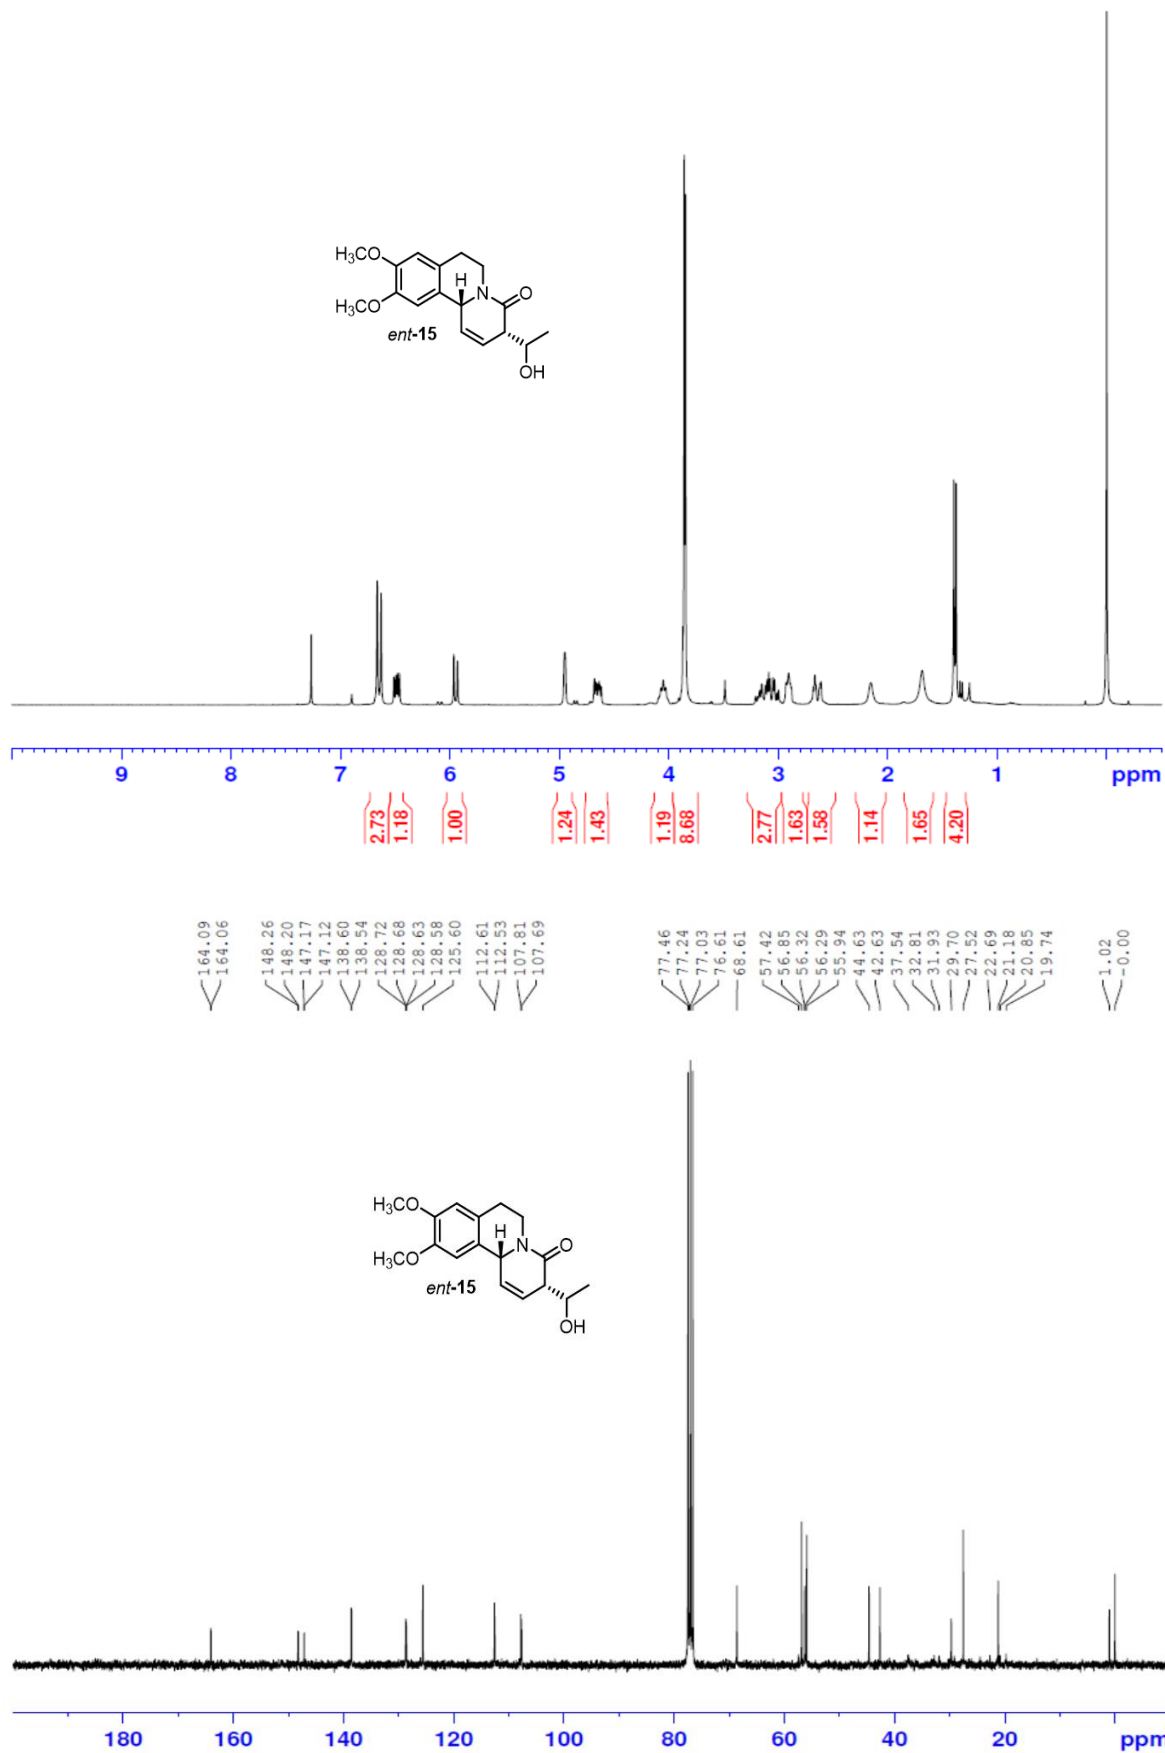

(3*S*,5*R*)-1-(3,4-Dimethoxyphenylethyl)-3-(dibenzylamino)-5-((*S*)-1-hydroxy-2-methylpropyl)piperidine-2,6-dione (**18**)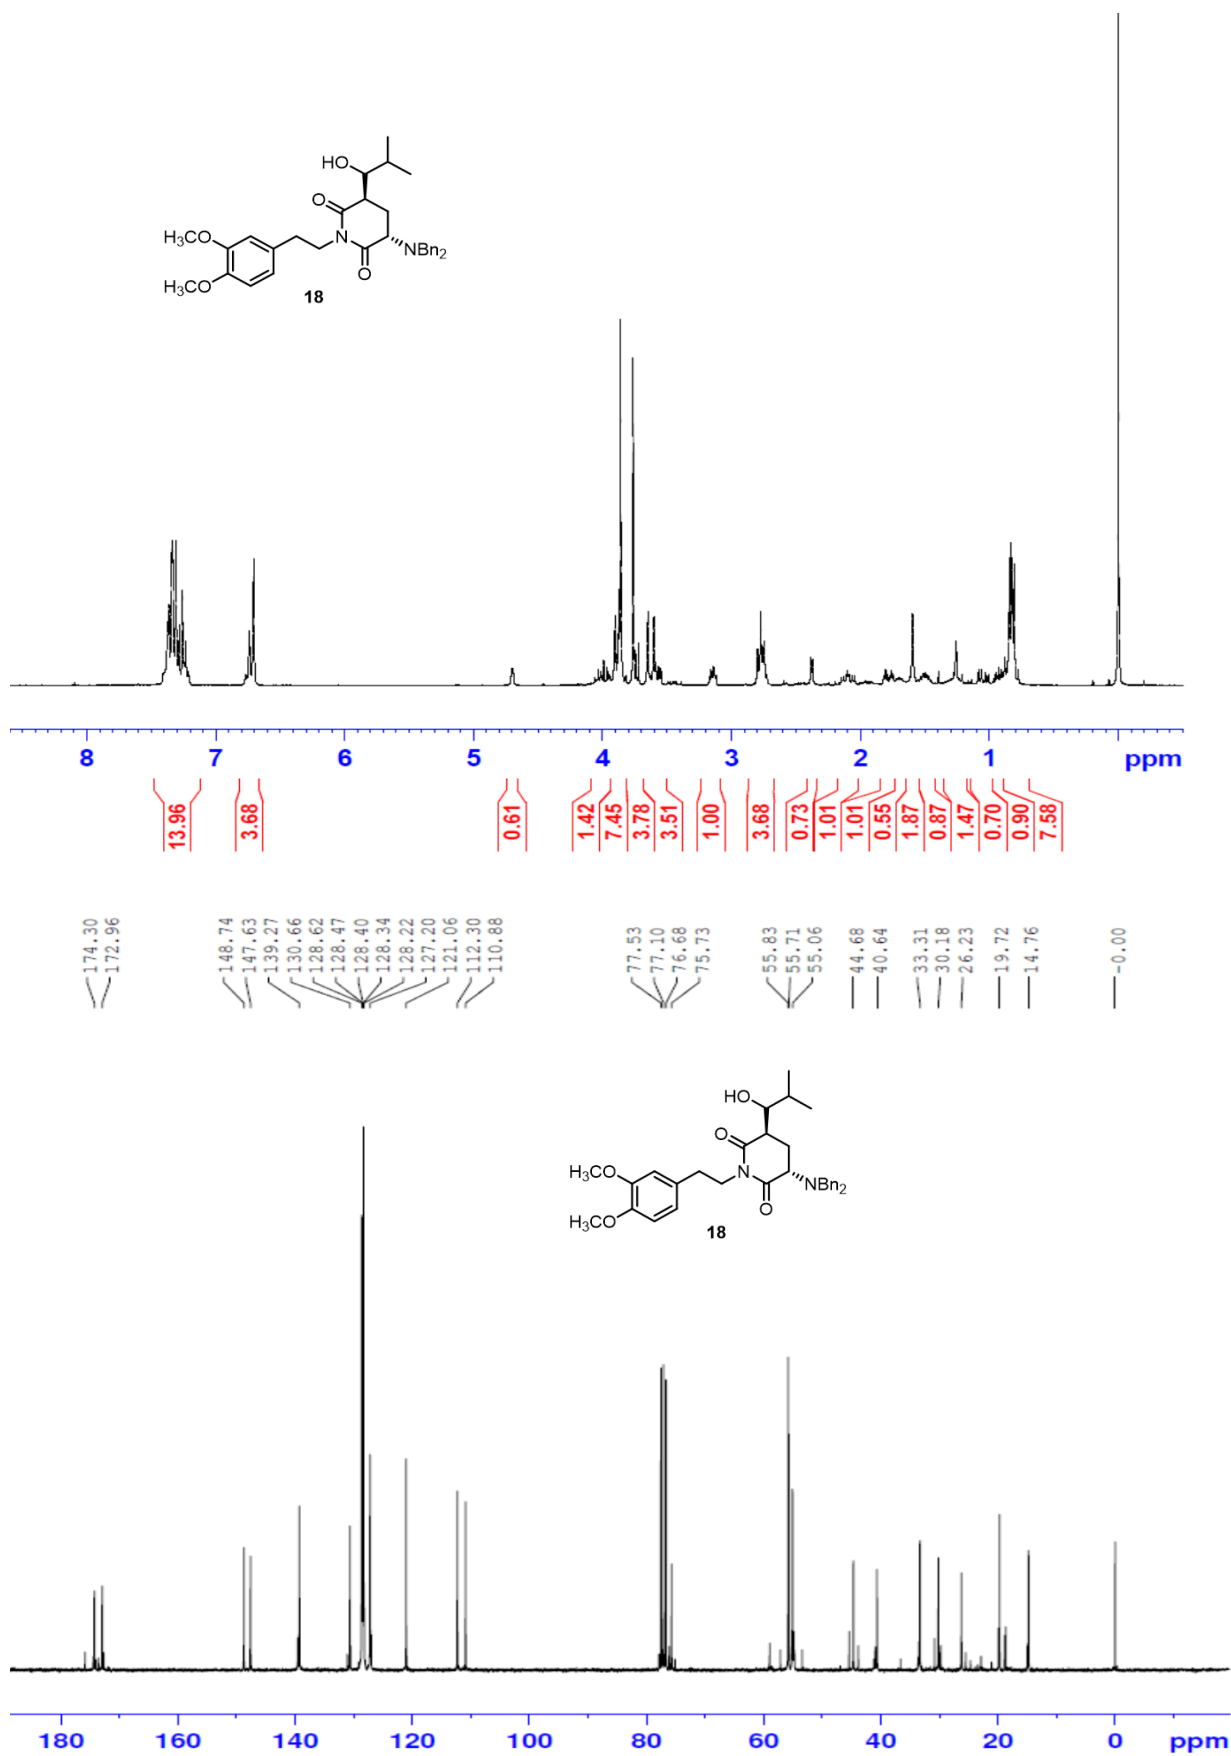



(3*S*, 5*S*)-1-(3,4-Dimethoxyphenylethyl)-3-(dibenzylamino)-5-((*R*)-1-hydroxy-2-methylpropyl)piperidine-2,6-dione (**19**)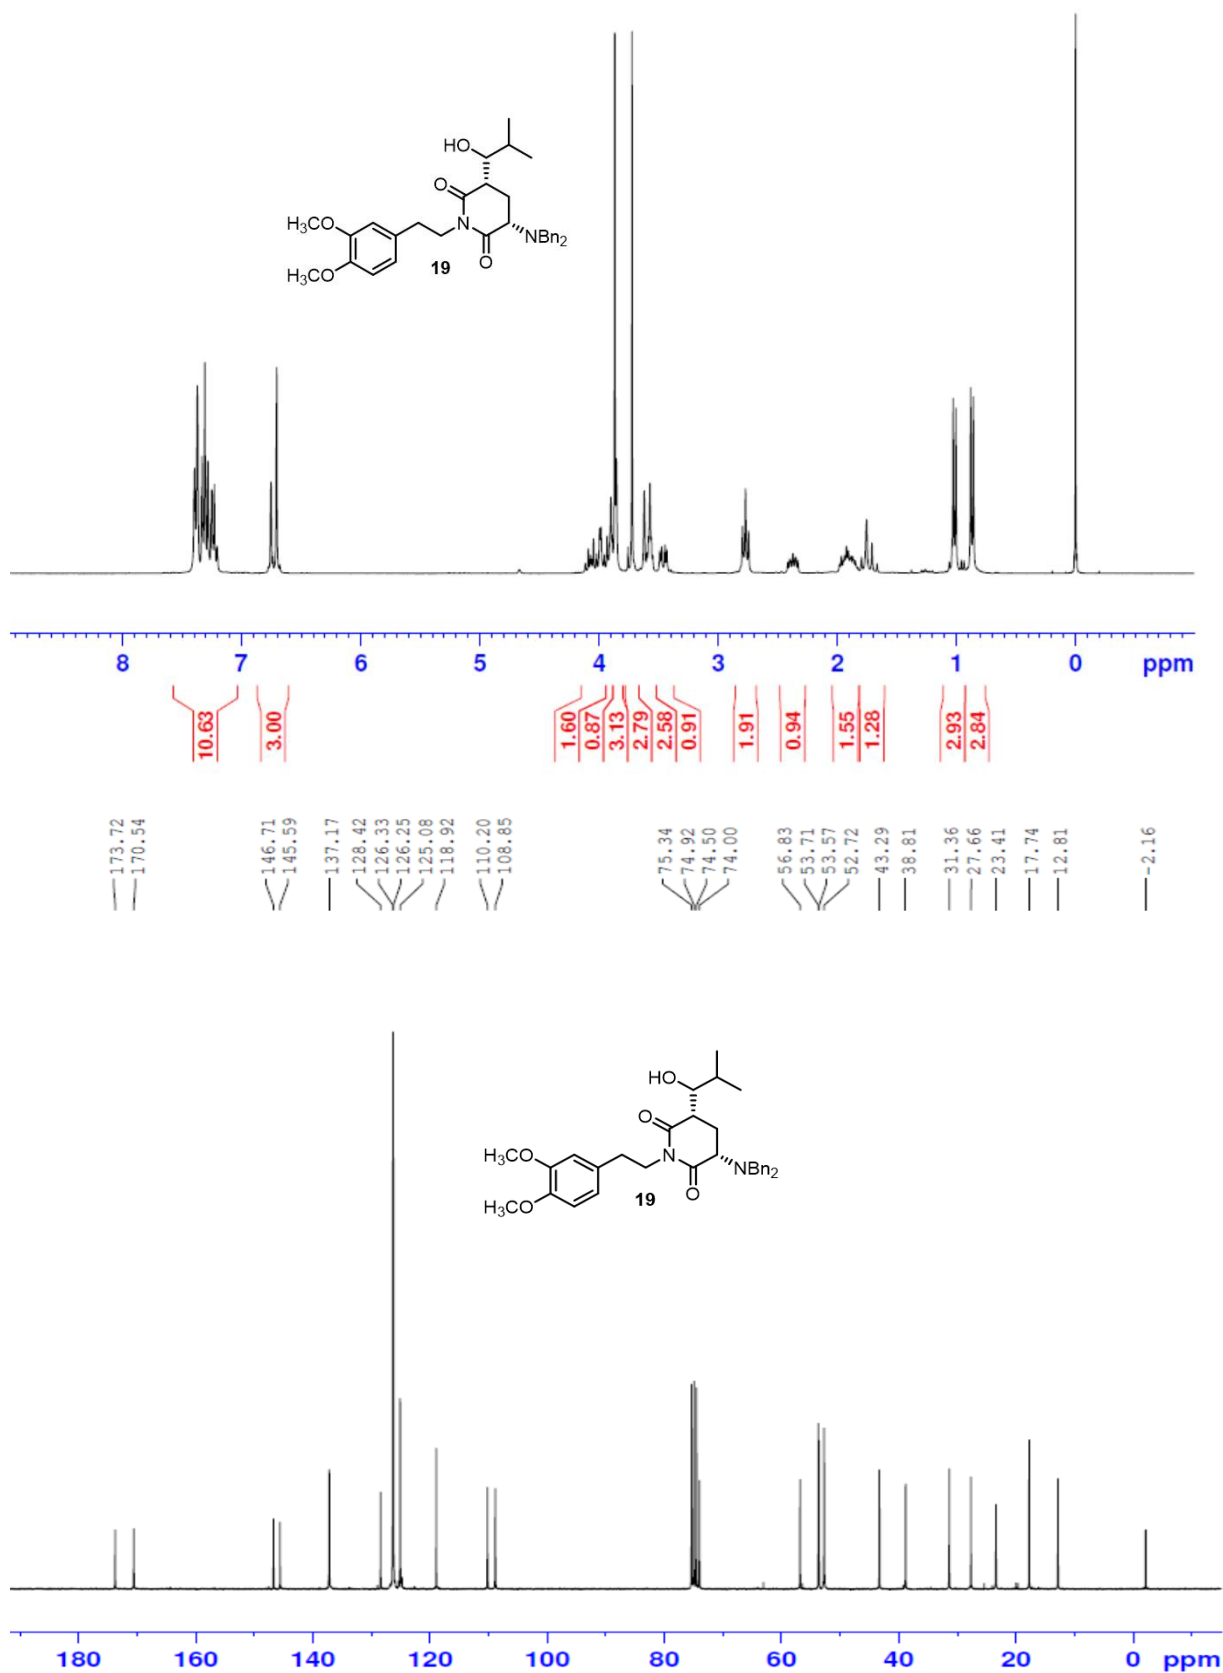

(1*S*,3*R*,11*bR*)-1-(dibenzylamino)-2,3,6,7-tetrahydro-3-((*S*)-1-hydroxy-2-methylpropyl)-9,10-dimethoxy-1*H*-pyrido[2,1-*a*]isoquinolin-4(11*bH*)-one (**21**)

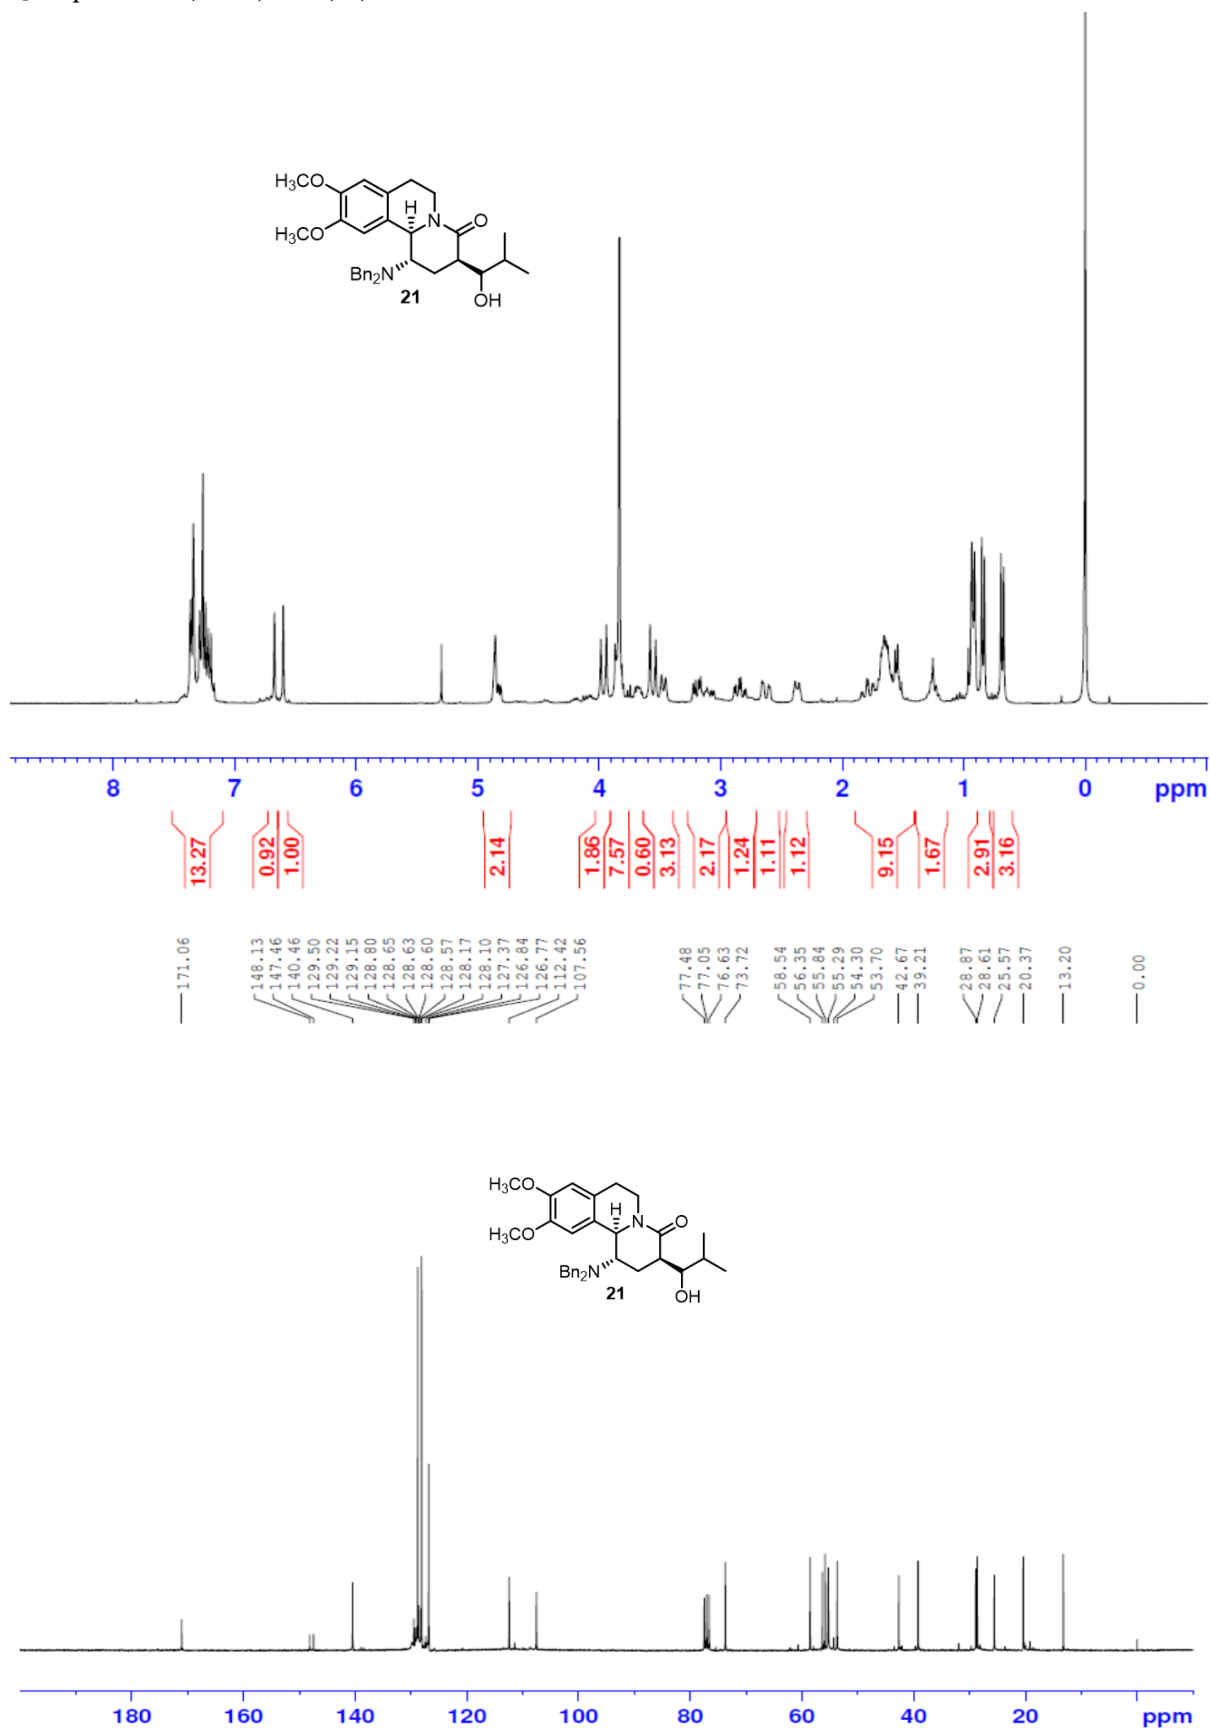

(3R,11bS)-6,7-dihydro-3-((S)-1-hydroxy-2-methylpropyl)-9,10-dimethoxy-3H-pyrido[2,1-a]isoquinolin-4(11bH)-one (**22**)

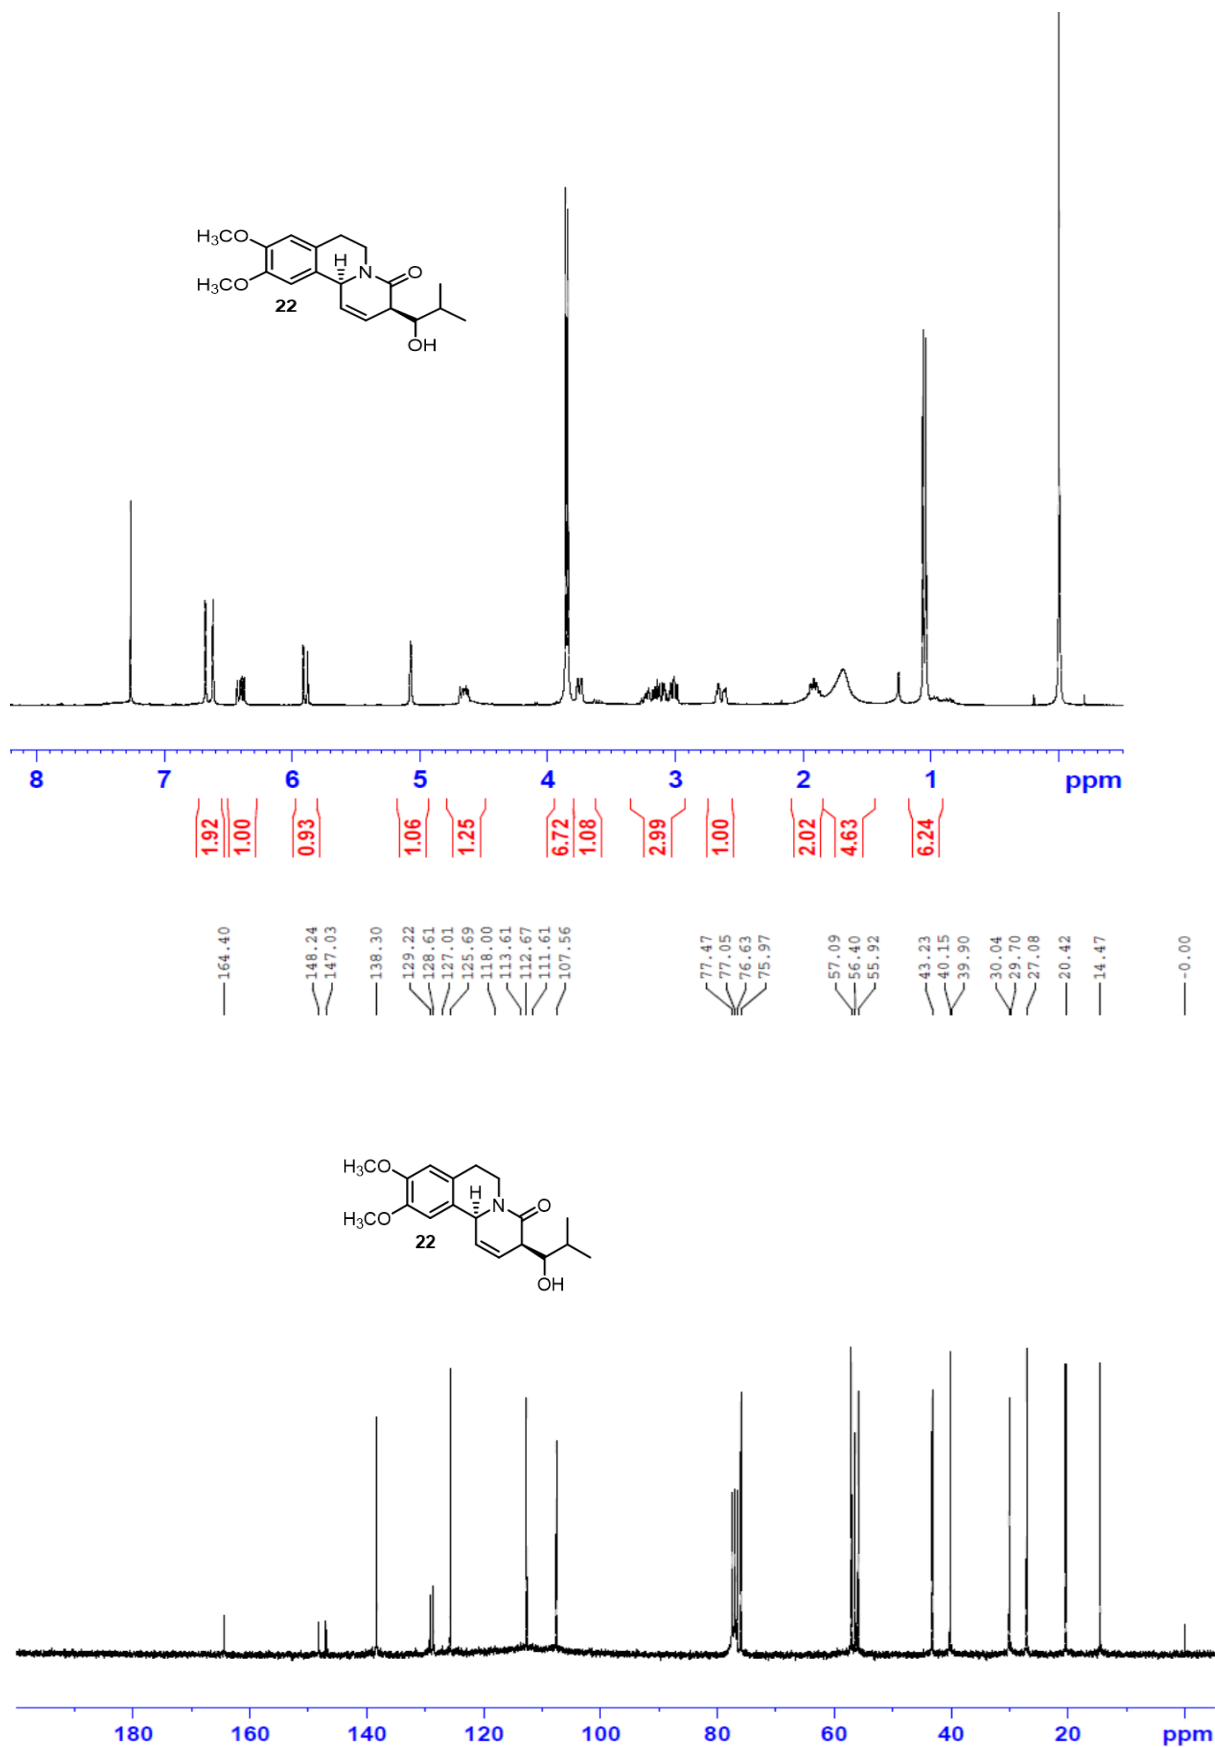

(1*S*,3*S*,11*bS*)-1-(dibenzylamino)-2,3,6,7-tetrahydro-3-((*R*)-1-hydroxy-2-methylpropyl)-9,10-dimethoxy-1*H*-pyrido[2,1-*a*]isoquinolin-4(11*bH*)-one (**24**)

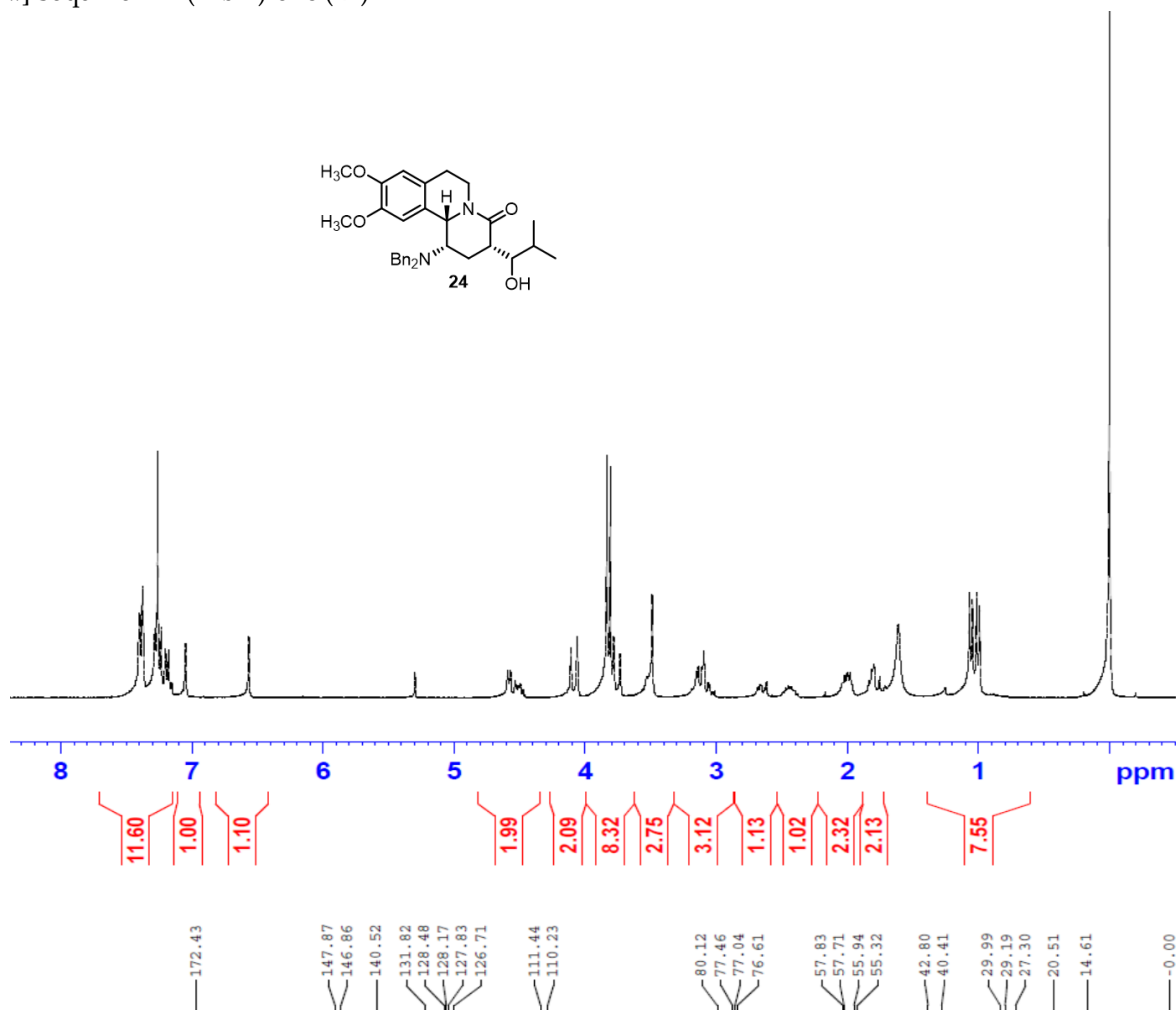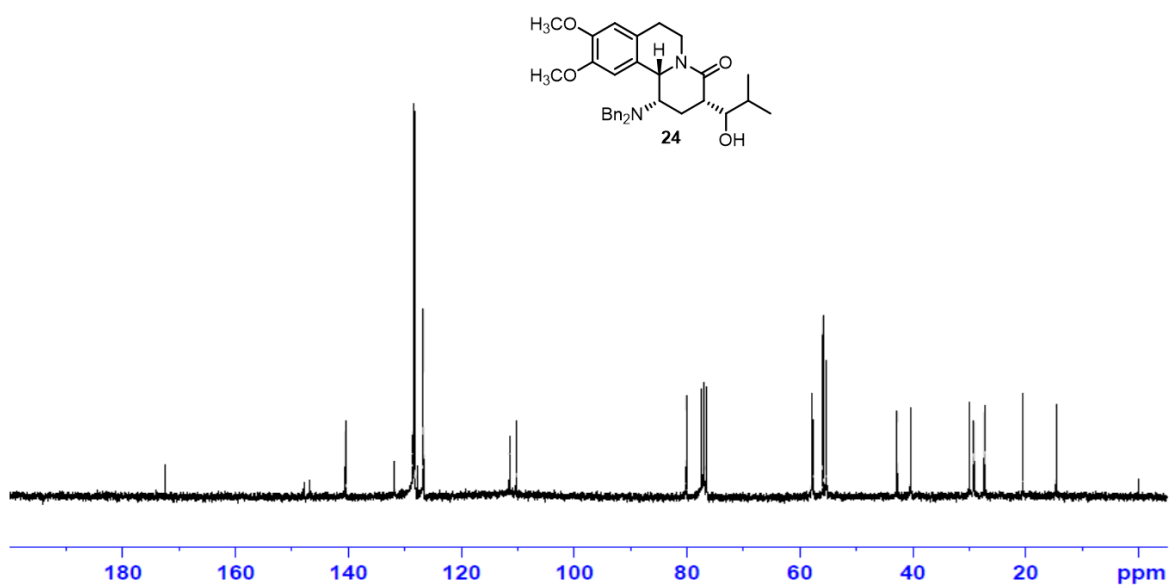

(3*S*,11*bR*)-6,7-dihydro-3-((*R*)-1-hydroxy-2-methylpropyl)-9,10-dimethoxy-3*H*-pyrido[2,1-*a*]isoquinolin-4(11*bH*)-one  
(*ent*-22)

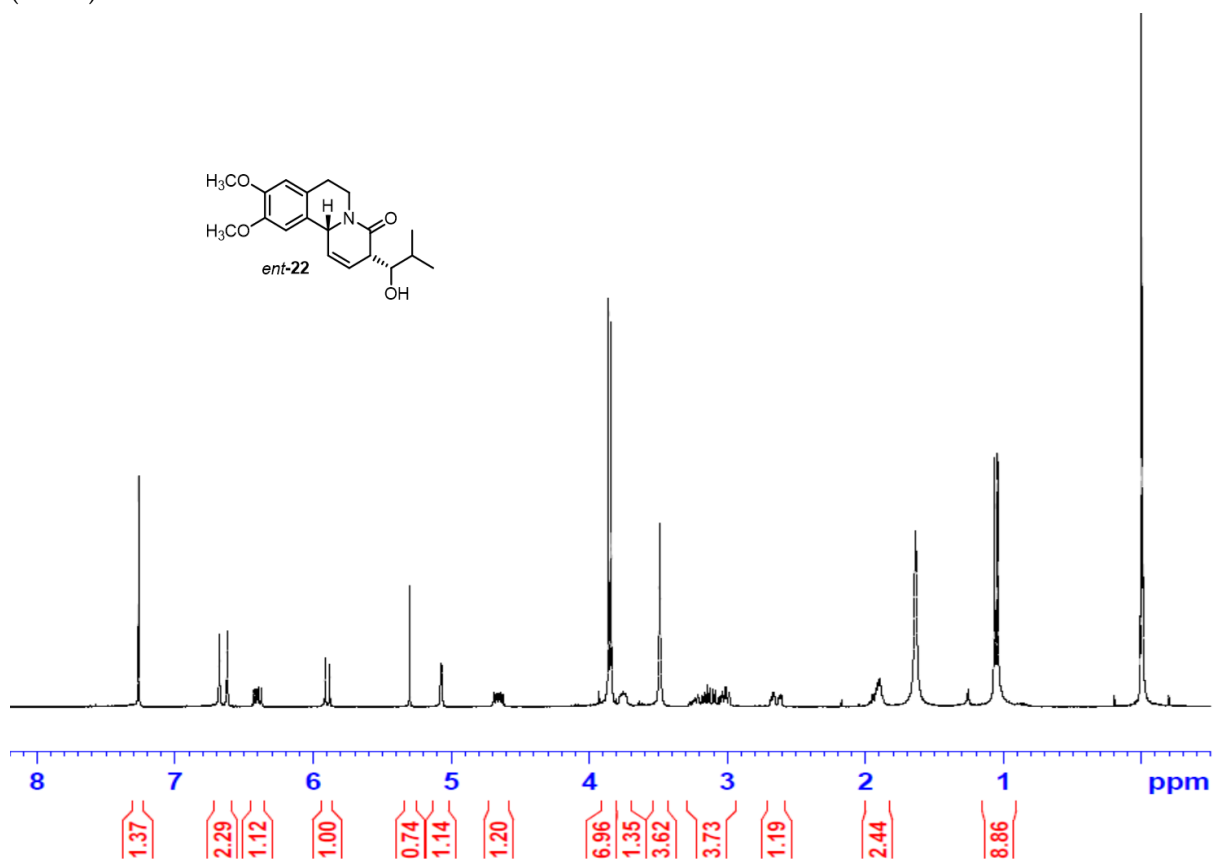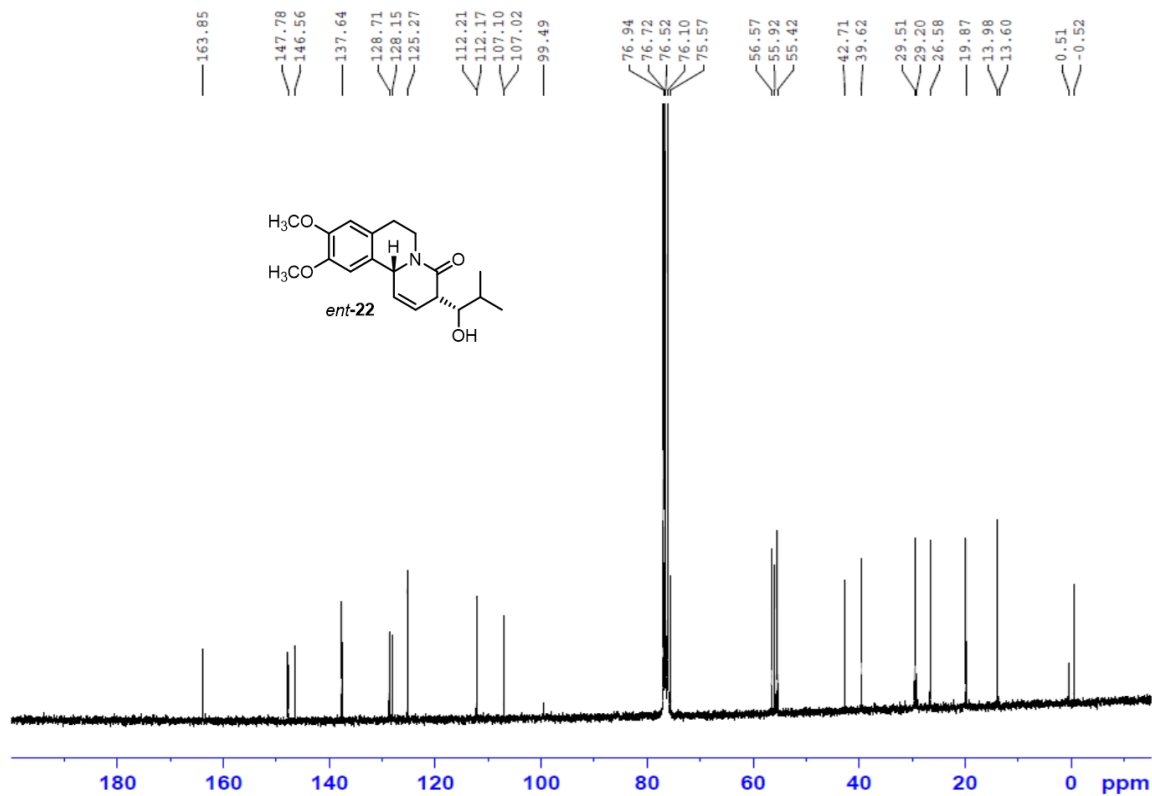

(3S, 5S)-1-(3,4-Dimethoxyphenylethyl)-3-(dibenzylamino)-5-((R)-1-hydroxyethyl)piperidine-2,6-dione TBS ether **26**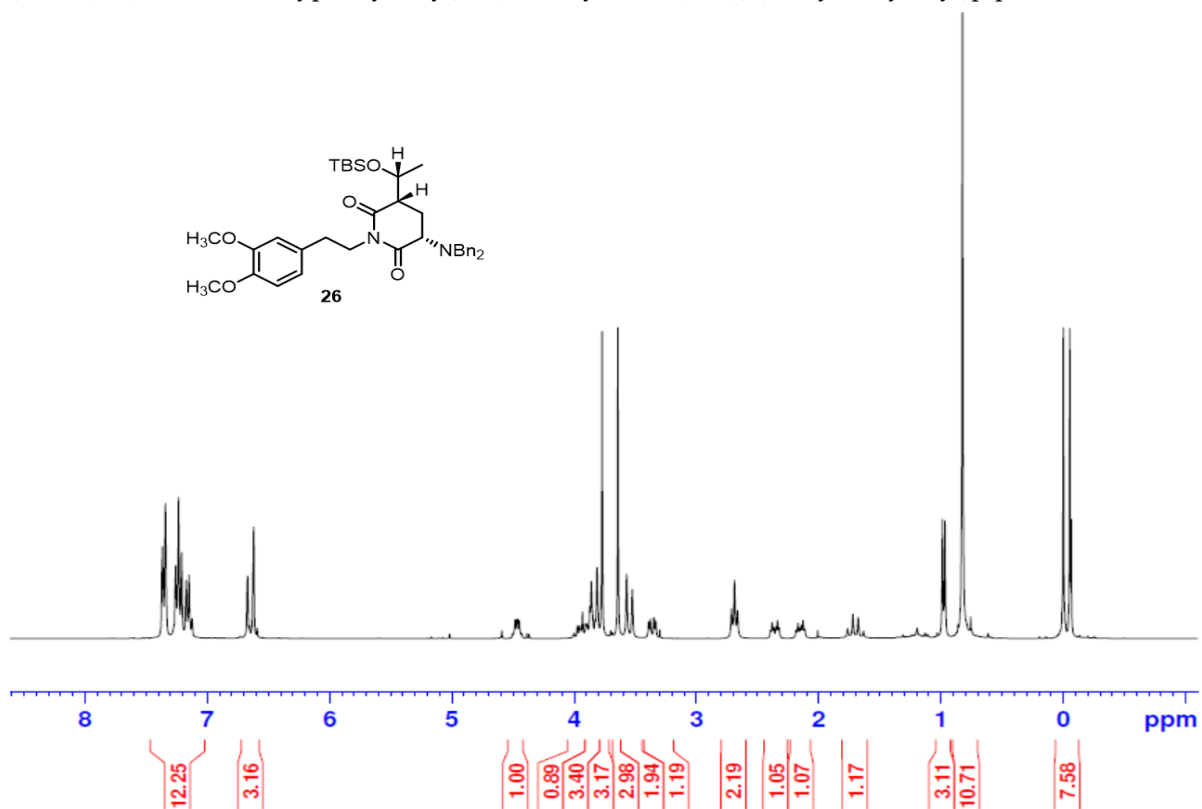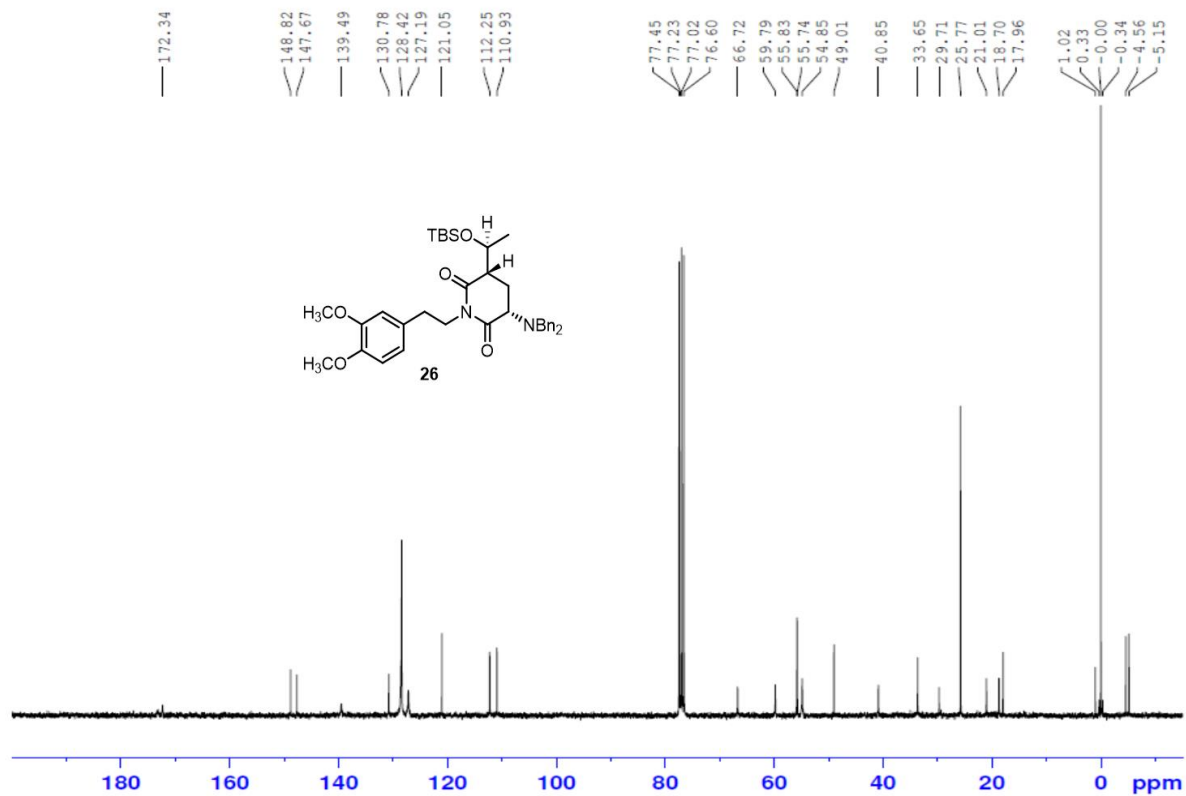

(1*S*,3*S*,11*bS*)-1-(dibenzylamino)-2,3,6,7-tetrahydro-3-((*R*)-1-hydroxyethyl)-9,10-dimethoxy-1*H*-pyrido[2,1-*a*]isoquinolin-4(11*bH*)-one (**28**)

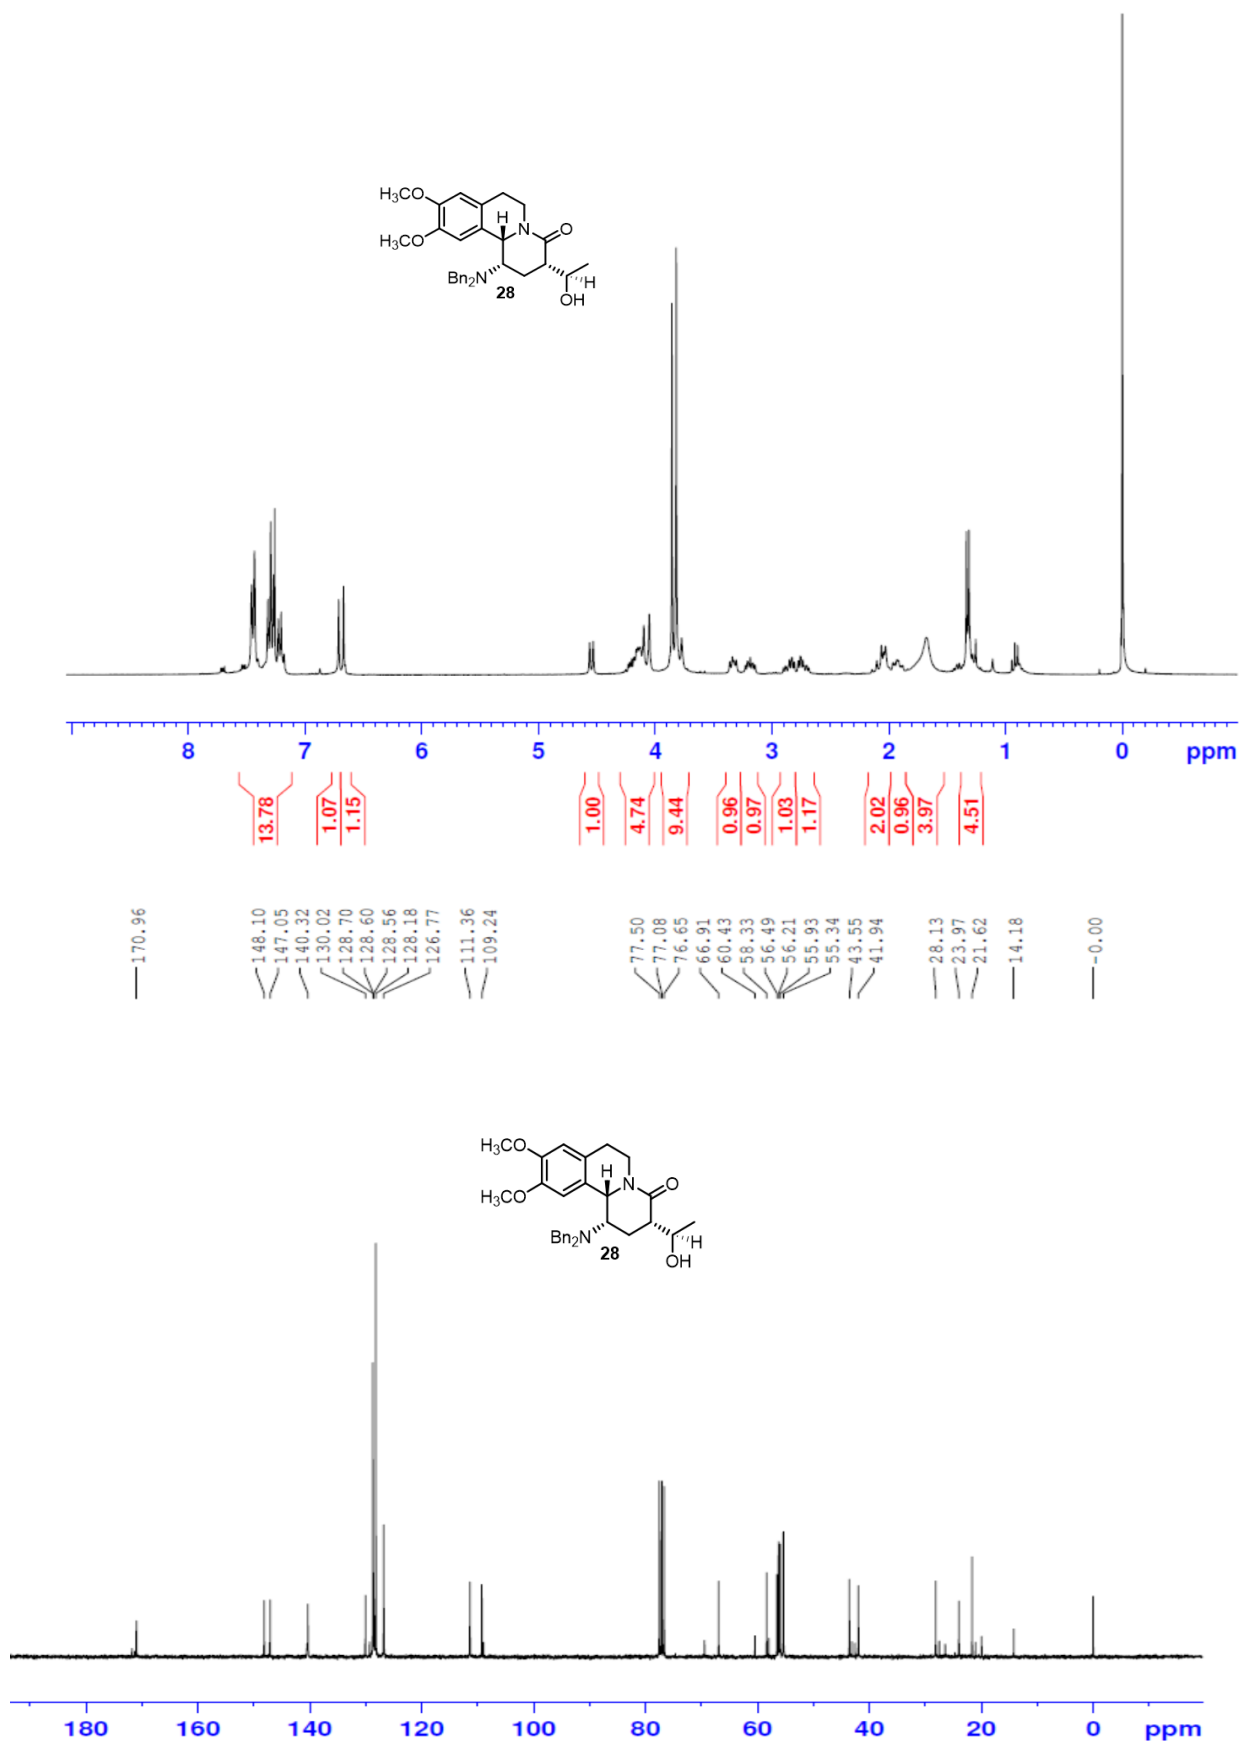

Supplement: s1 [file s1]
